# Supplementary material
Source: PubMed Central journal article supplement (PMC4071378)
Supplement: JCI73048sd.pdf [file JCI73048sd.pdf]

## Supplementary Data

### Supplementary Methods:

**Cell viability assay.** Cells were seeded overnight at a density of 2,000 cells per well in 96-well plates in RPMI with 10% FBS and then treated with the relevant reagents for 3 days. For MP08 and MP41 cells, the primary cells were first established in conditioned media (The American Journal of Pathology, 180, 2, 599, 2012) and then transferred to 10% FBS RPMI for viability studies. Viable cell numbers were determined using MTS assay kit according to the manufacturer's protocols (Promega). Each assay consisted of three replicates and was repeated at least twice. Data were expressed as percentages of control cells, calculated from the absorbance corrected for background.

**Caspase 3/7 assay.** Caspase activity was detected by using Caspase-Glo® 3/7 assay kit (Promega). Briefly, cells ( $2 \times 10^4$  cells/well) were seeded in a luminometer white 96 plate (Thermo scientific) and incubated for 24 hr at 37°C. Cells were treated with vehicle or with Erlotinib for 5 hrs. One hundred microlitre of caspase 3/7 reagents were added to each well and incubated for 1 hr on rotary shaker at room temperature. Luminescence for each well was recorded using GLOMAX+ instrument (Promega).

**Cell cycle analysis by Flow cytometry.** Cells were exposed to Erlotinib for 24 hr. Approximately  $1.5 \times 10^5$  cells were collected and centrifuged at 1,000 rpm for 5 min. DNA staining was performed by adding 500  $\mu$ l propidium iodide (200  $\mu$ g/mL in Triton X-100, 0.2% v/v saline, Final concentration: 100  $\mu$ g/mL) and 50  $\mu$ L RNAase (final concentration: 40  $\mu$ g/mL) to  $1.5 \times 10^5$  cells. Cellular DNA content was measured by Becton Dickinson FACStar Plus dual laser system and a FACSort system. Approximately 10,000 cells were analyzed for each DNA content histogram. The samples were excited at 380–410 nm and the resulting fluorescence measured at wavelengths  $>550$  nm. Analysis of the percentage of

cells in G1, S and G2 /M phases of the cell cycle was made by the ModFit LT program (Verify Software Home).

**Western blot analysis.** Cell lysates were prepared using a RIPA buffer (Sigma) according to the manufacturer's instruction. Protein samples were applied to the wells of NuPAGE 4-20% Tris-Gly gel, electrophoresed in SDS running buffer (Invitrogen), and transferred to Nitrocellulose membranes using the iBlot transfer apparatus (Invitrogen). Membranes were blocked in Tris-buffered saline containing 0.5% Tween 20 (TBS-T) and 5% BSA for 1 hr at room temperature followed by incubation with primary antibody overnight at 4°C. After membranes were washed three times for 10 min each in TBS-T, HRP-conjugated secondary antibody (Bio-Rad) in TBS-T containing 2% BSA was applied for 1 hour at room temperature. Proteins were visualized using G-box Chemi Systems (SynGene).

**Quantitative RT-PCR.** Quantitative RT-PCR was performed on RNA isolated from NSCLC cells and patient samples. Total RNA was extracted using RNeasy mini kit (Qiagen), RNeasy FFPE kit (Qiagen) and RNAlater RNA stabilization reagent (Qiagen), according to the manufacturer's instructions. cDNA was synthesized with High Capacity cDNA Reverse transcription Kit (Applied Biosystems) and Taqman microRNA Reverse Transcription Kit (Applied Biosystems). RT-PCR was performed on a LightCycler with SYBR Green system (Roche) using 7900HT Fast Real-Time PCR system (Applied Biosystems). GAPDH expression was used as an internal reference to normalize input cDNA. Primer sequences used for real-time RT-PCR and quantitative RT-PCR of Cripto-1, Cripto-3 and GAPDH are: (1) Cripto-1: Forward 5'-TCCAGTTTCCCCTGGAC G-3' and Reverse 5'-TTTAAGAAGAAAATGAGAAATTCGTT-3'; (2) Cripto-3: Forward 5'-TGTA AACGACGGCCAGTTCTACCCGGCTGTGATGGCC-3' and Reverse 5'-CAGGAAACAGCTATGACCGAGGTAAGAAGTAGTTAGTTCTGT-3'; (3) GAPDH: Forward 5'-TGATGACATCAAGAAGGTGG-3' and Reverse 5'-TTTCTTACTCCTTGGAGGCC-3'. The specificities of Cripto-1 and -3 specific primers were validated in Cripto-1-positive/Cripto-3-negative (H727) and Cripto-3-

positive/Cripto-1-negative (H69) cells (Biochem Biophys Res Commun. 377(1):215-20, 2008) (See Figure 1C). Taqman gene expression assays (Src: Hs01082246\_m1; GAPDH: Hs02758991\_g1; miR-205: has-miR-205-5p) were purchased from Invitrogen.

**siRNA- and shRNA-mediated knockdown.** Transfection of a small interfering RNA (siRNA) duplex targeting human Cripto-1 (Invitrogen, Stealth TDGF1-HSS144243), human SRC (Thermo, ON-TARGET Human SRC) and miR-205 inhibitor (Ambion, AM11015) were carried out using PepMut™ siRNA transfection reagent (SignaGen), according to the manufacturer's instructions. Briefly, cells were seeded at a density of  $6 \times 10^5$  cells/well in a 6-well tissue culture dish and incubated overnight. Cells were then transfected with the siRNA-PepMute mixture (200 pmol siRNA and 2.4  $\mu$ l PepMute reagent) for 3 days. As a negative control, we used Stealth Negative control siRNA (Invitrogen). In the shRNA experiments, cells were infected with ZEB1 shRNA (Open Biosystems shRNA Library) retrovirus in the presence of 1  $\mu$ g/ml polybrene, and were selected for 48 hrs with 1  $\mu$ g/ml of puromycin 48 hrs after infection. Expression was measured by western blot 48–72 h later.

**Cripto-1 and miR-205 overexpression studies.** To establish stable cell lines, the pCI-neo-hCripto-1 (Normanno et al., 2004) or miR-205 (HmiR0026-MR04, GeneCopoeia™) expression vectors were transfected using lipofectamin™ 2000 plus (Invitrogen) following the manufacturer's instruction. All vectors were linearized by AhdI (NEB) enzyme to increase efficiency of plasmid integration. Cells (70-80% confluence) were washed with Opti-MEM (Invitrogen), and incubated with a DNA-lipofectamine mixture (2  $\mu$ g DNA and 3  $\mu$ l lipofectamine reagent). For stable transfection, the transfected cells were selected with 500  $\mu$ g/ml of the antibiotic G418 (Gibco). The parental cells transfected with empty vectors were generated as controls. Cripto-1 over-expression was detected using an anti-human Cripto-1 rabbit monoclonal antibody (Epitomics) by western blot and miR-205 expression was measured by RT-PCR.

**Migration and invasion assay.** CytoSelect™ 24-Well Cell Invasion and migration Assay kits were purchased from Cell Biolabs. According to the manufacturer's instructions, cells were serum-starved overnight and  $5 \times 10^5$  cells in 300  $\mu$ l of medium without FBS were placed in the upper chamber of transwell plates and the lower chamber was filled with 0.5 ml of medium supplemented with 10% FBS. To quantify the migrated and invaded cells, crystal violet-stained cells were extracted by extraction buffer followed by spectrophotometer measurement at 560 nm.

Supplementary Figures:

A

MP41

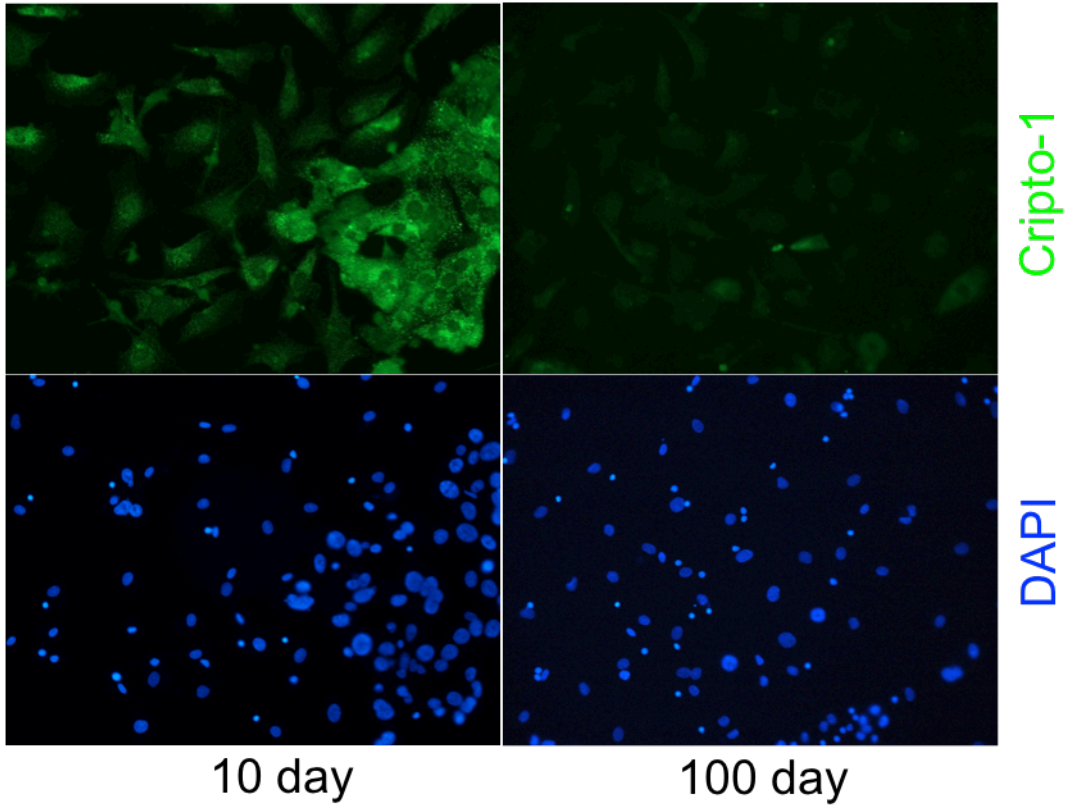

B

MP41

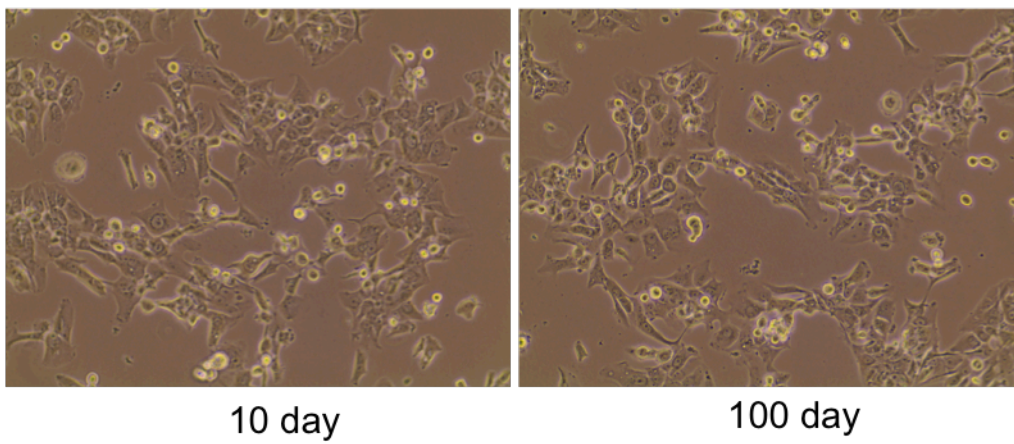

**Supplementary Figure 1** (A) Cripto-1 immunocytochemistry of MP41 cells. Cripto-1 is expressed in the early passaged cells (day 10) and loss of Cripto-1 expression occurs in all cells, not just a subpopulation of the late passaged (day 100) MP41 cells. Cripto-1 was stained with Cripto-1 antibody (Rockland) and DNA by DAPI. Magnification: x200 (B) Cell morphology (phase contrast images) of early (10 day) and late (100 day) passaged MP41 cells. Magnification: x200

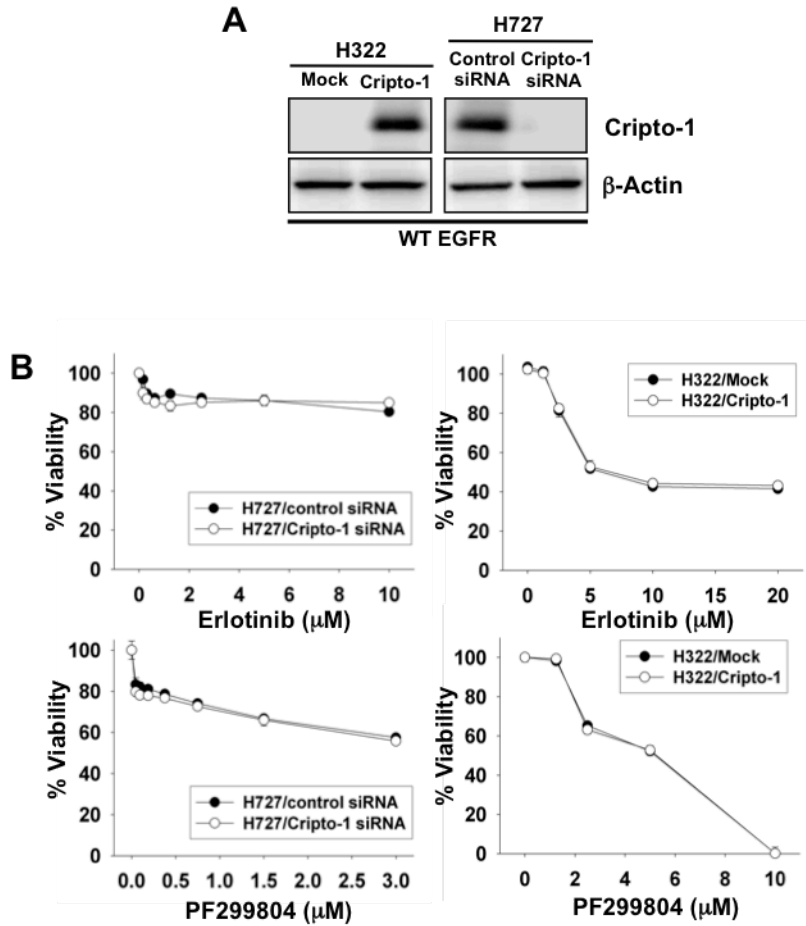

**Supplementary Figure 2.** Cripto-1 does not affect sensitivity of EGFR WT NSCLC cells to EGFR-TKIs. (A) Western blot analysis of Cripto-1 expression in Cripto-1 and Cripto-1 siRNA transfected NSCLC cells. WT, wild-type. (B) Cripto-1 does not affect erlotinib and dacomitinib sensitivity of NSCLC cells harboring wild-type EGFR.

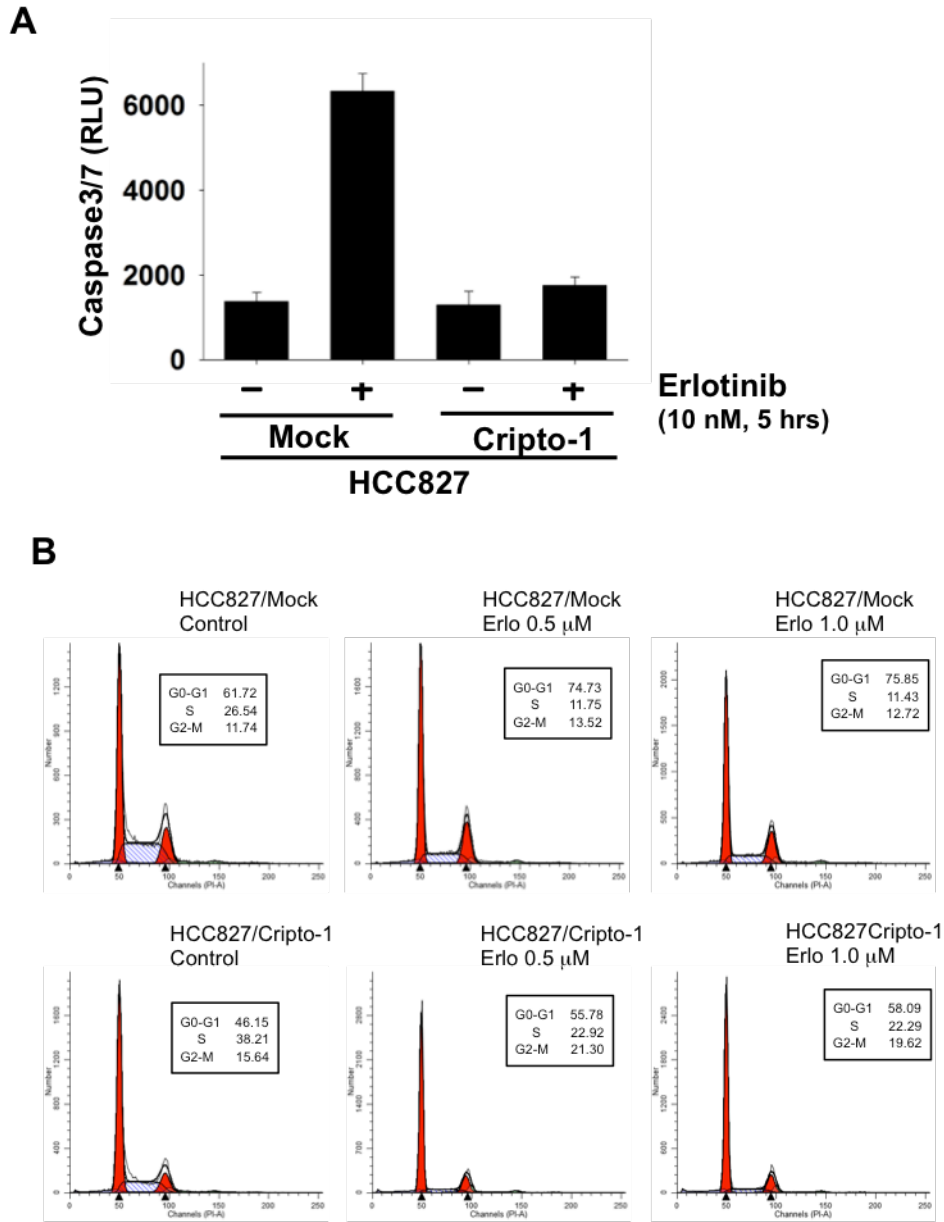

**Supplementary Figure 3.** Cripto-1 attenuates EGFR inhibitor-induced apoptosis. (A) Caspase 3/7 activity was measured in HCC827/Mock and HCC827/Cripto-1 cells in the presence or absence of erlotinib as indicated. RLU, Relative Luciferase Unit. (B) Cell cycle analysis in erlotinib-treated HCC827/Mock and HCC827/Cripto-1 cells by FACS.



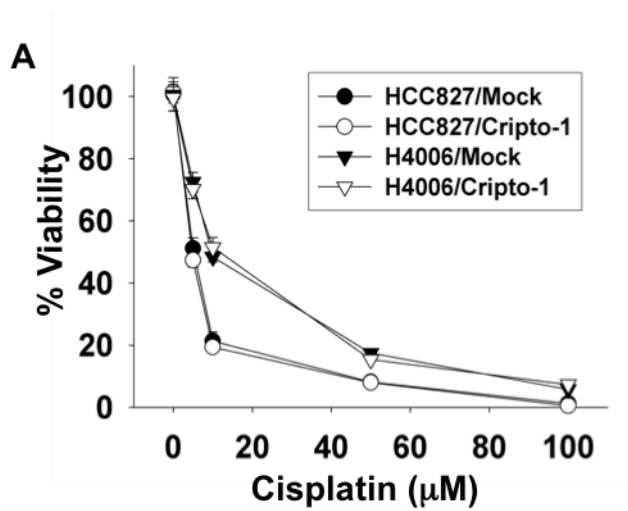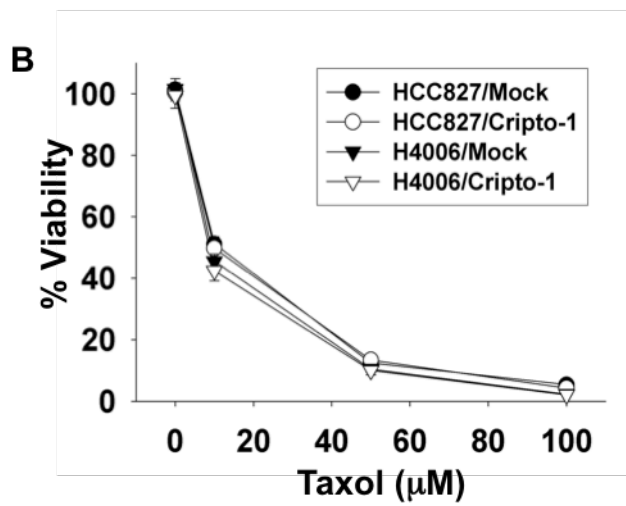

**Supplementary Figure 4.** MTS assay on the effect of Cisplatin (A) and Taxol (B) in HCC827/Cripto-1 and H4006/Cripto-1 cells.

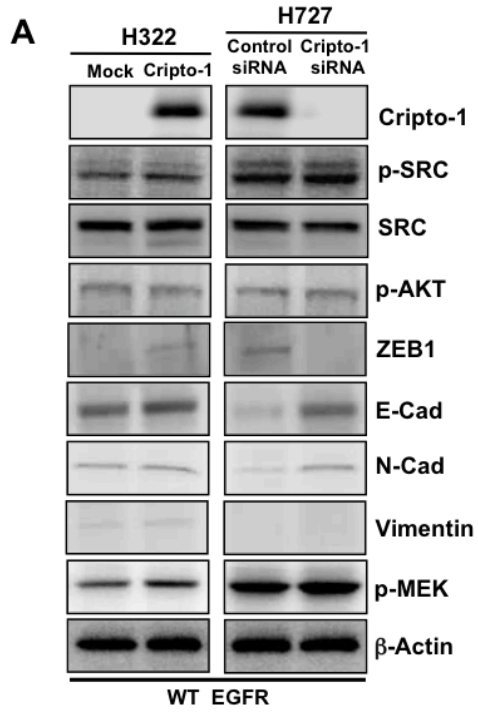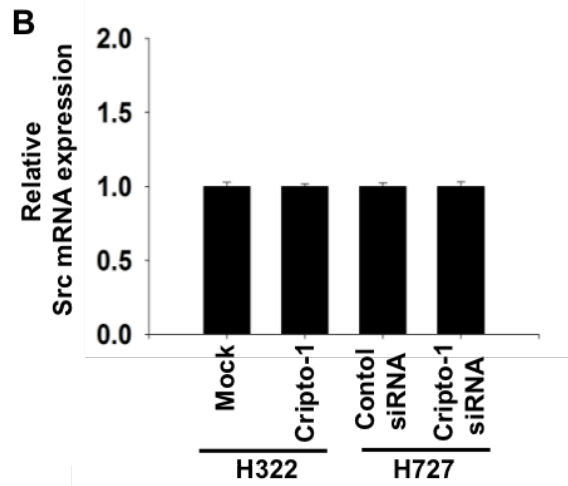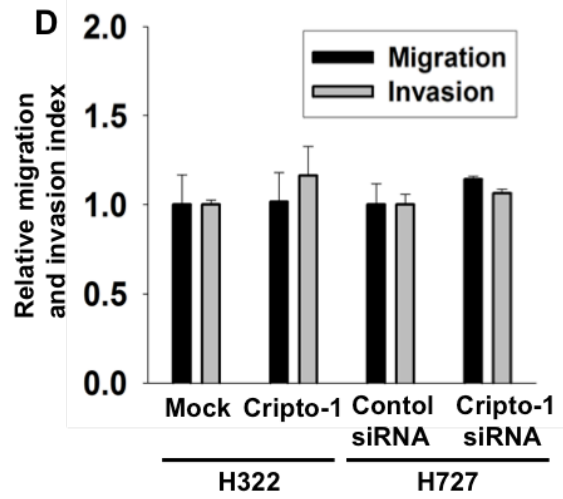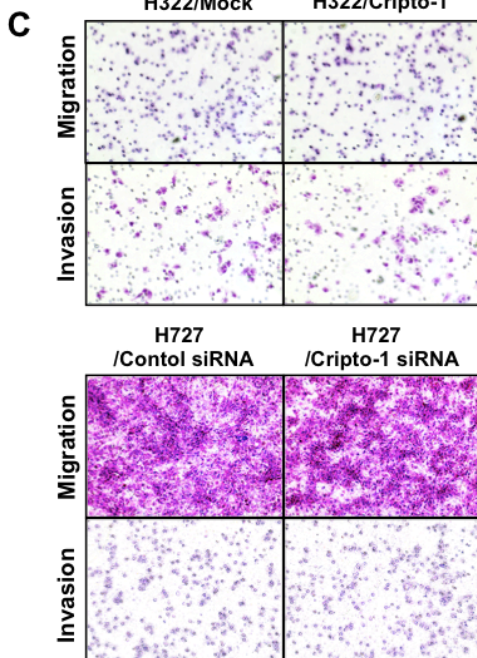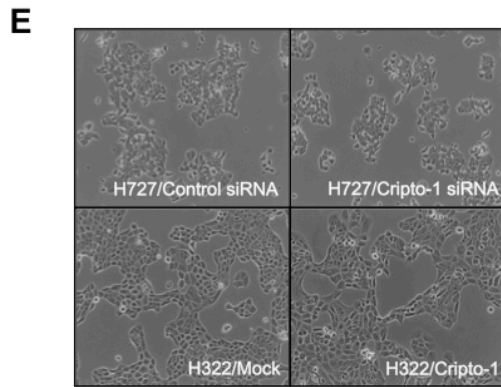

**Supplementary Figure 5.** Effect of Cripto-1 on SRC signaling and EMT. (A) Western blot analysis of both SRC and EMT signaling protein expression in EGFR WT NSCLC cell lines either stably-transfected with Cripto-1 or knocked-down by Cripto-1siRNA. Cripto-1 blot is the same with supplementary figure 2A. (B) The level of SRC mRNA in Cripto-1 stably-transfected and siRNA knockdown NSCLC cell lines by RT-PCR. (C and D) Cell migration and invasion were measured as described in Materials and Methods. Data are representative of three independent experiments. (E) Phase-contrast images of Cripto1-transfected and -knockdown NSCLC cell lines. Note no morphology changes in H727/Cripto-1 siRNA and H322/Cripto-1 cells; Magnification, 200X.

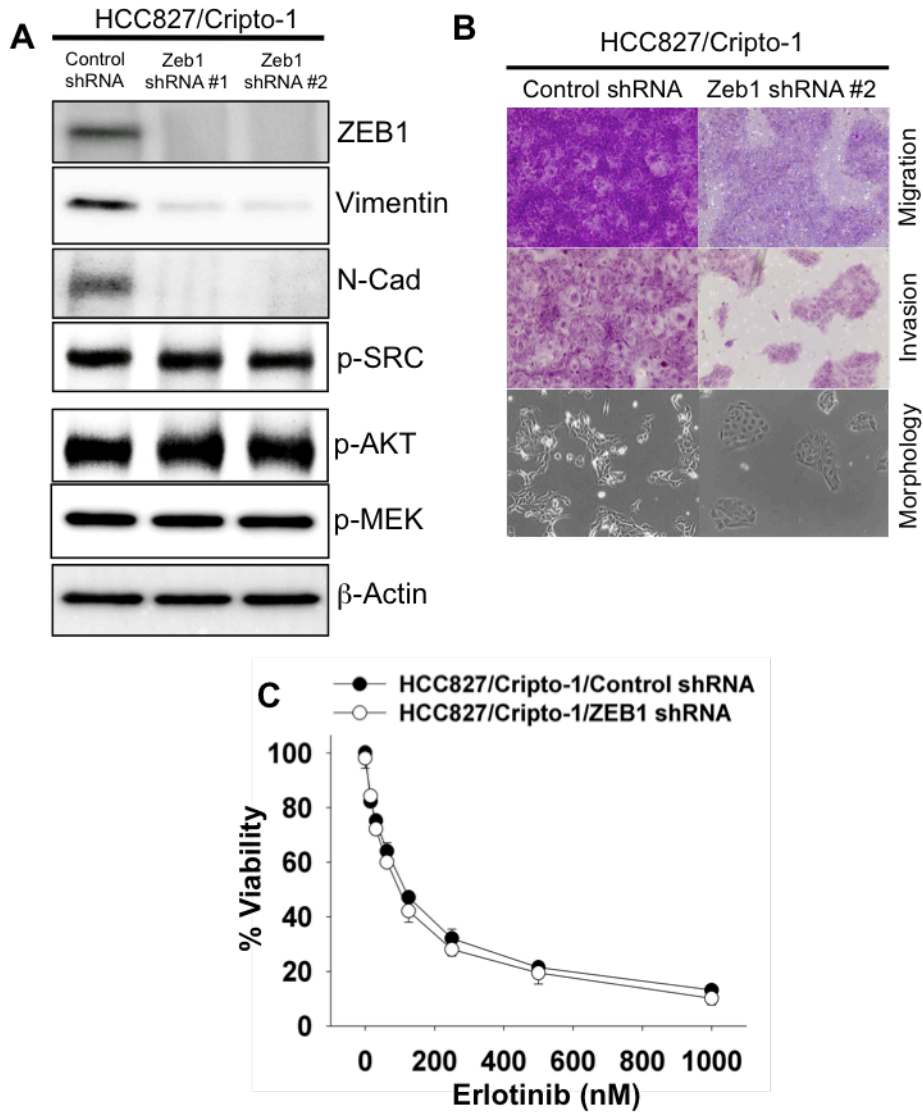

**Supplementary Figure 6.** Cripto-1-induced EGFR-TKI resistance is not ZEB1-dependent. (A) Western blot analyses of ZEB1, Vimentin, N-Cadherin and pSRC in HCC827/Cripto-1/ZEB1 shRNA cells. (B) ZEB1 knockdown reversed the EMT phenotype but (C) failed to restore erlotinib sensitivity of HCC827/Cripto-1 cells. Magnification, 200X.

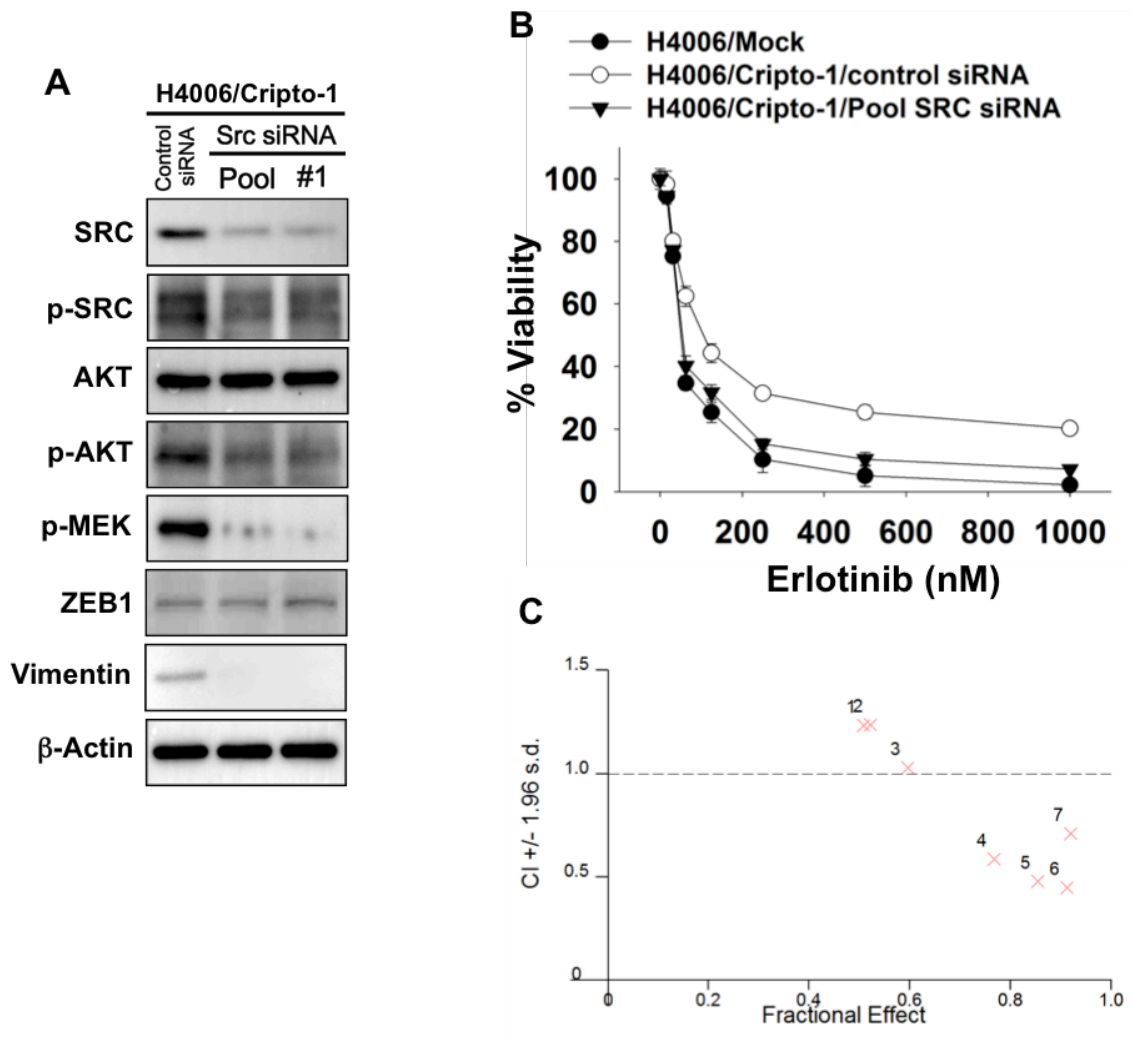

**Supplementary Figure 7.** Cripto-1-induced EGFR-TKI resistance is SRC dependent. (A) Western blot analysis of HCC4006/Cripto-1 cells 72 hrs after SRC siRNA transfection.  $\beta$ -actin was used as loading control. (B) SRC siRNA reinstated erlotinib sensitivity of HCC827/Cripto-1 cells. Two days after transfection, the indicated cell lines were treated with erlotinib for 3 days, followed by MTS assay. Data represent triplicate experiments. (C) Synergistic effect of AZD0530 and erlotinib combination. MTS assays were performed in HCC827/Cripto-1 cells treated with 150 nM of erlotinib plus increasing concentrations of AZD0530 (15.625, 31.25, 62.5, 125, 250, 500 and 1000 nM) for 3 days. Fa, fraction affected; CI, combination index.

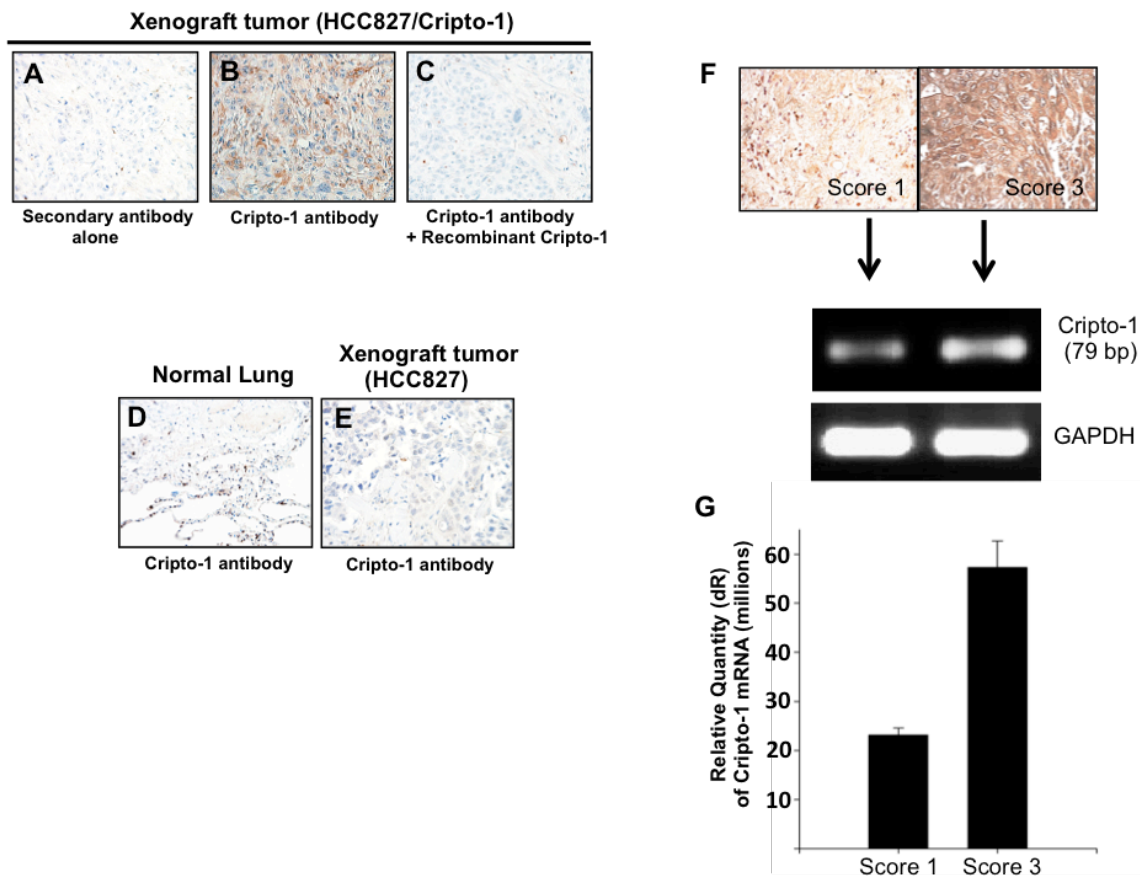

**Supplementary Figure 8.** Specificity of Cripto-1 antibody. Immunohistochemical staining of HCC827/Cripto-1 xenograft tumors with (A) secondary antibody alone, (B) Cripto-1 antibody (Rockland) and (C) Cripto-1 antibody blocked with recombinant human Cripto-1 protein (R&D systems). Cripto-1 immunohistochemical staining of (D) human normal lung tissue and (E) HCC827 xenograft tumors. (F) RT-PCR verification of Cripto-1 expression (bottom) on human NSCLC samples that express Cripto-1 protein at different levels (See Figure 6A and B) quantified by immunohistochemistry using Cripto-1 specific antibody (top). (G) Similar experiments to Figure S8F were performed by real-time PCR using different Cripto-1 specific primers. Note that the RNA was extracted from tumor cells (marked by a pathologist) scraped out of H&E-stained FFPE slides. Magnification, 400X

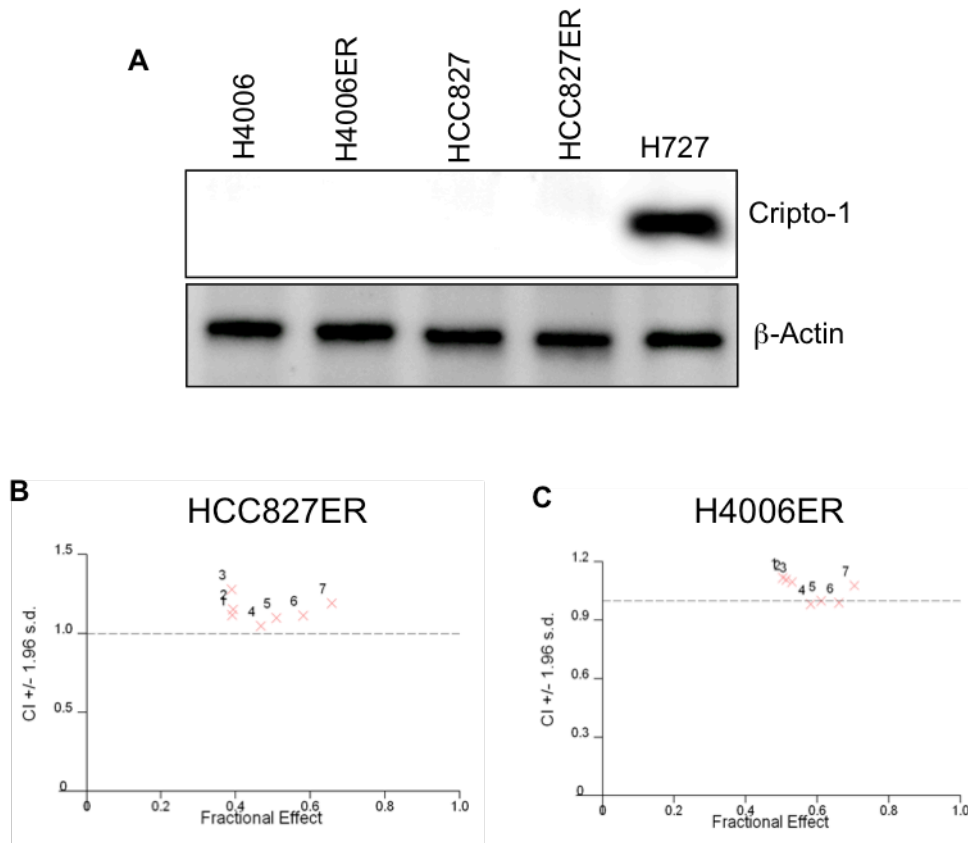

**Supplementary Figure 9.** AZD0530 and erlotinib combination elicits no synergy in acquired erlotinib-resistant NSCLC cells. (A) Western blot analysis. Cripto-1 expression is not elevated in acquired erlotinib-resistant (ER) NSCLC cell lines. (B and C) MTS assays were performed in acquired erlotinib-resistant cells treated with erlotinib at IC<sub>50</sub> concentration (40  $\mu$ M for HCC827ER and 20  $\mu$ M for H4006ER) plus increasing concentrations of AZD0530 (0.15625, 0.3125, 0.625, 1.25, 2.5, 5 and 10  $\mu$ M) for 3 days. CI, combination index.

**Supplementary Table 1.** IC50 of Cripto-1-overexpressed and Cripto-1 siRNA-transfected NSCLC cell lines harboring mutant (A, related to Figure 2B) and wild (B, related to Supplementary Figure 2B) EGFR. MTS assays were performed 72hrs after erlotinib and dacomitinib (PF299804) treatment. Data represent means  $\pm$  SD of triplicate measurements relative to untreated cells.

A

| Cell name       | Erlotinib (IC50) | PF299804 (IC50) | EGFR        |
|-----------------|------------------|-----------------|-------------|
| HCC827/Mock     | 10 nM            | 2 nM            | Exon 19 del |
| HCC827/Cripto-1 | 75 nM            | 20 nM           |             |
| H4006/Mock      | 50 nM            | 10 nM           | Exon 19 del |
| H4006/Cripto-1  | 100 nM           | 26.3 nM         |             |
| H3255/Mock      | 50 nM            | 1.5 nM          | L858R       |

B

| Cell name           | Erlotinib (IC50) | PF299804 (IC50) | EGFR |
|---------------------|------------------|-----------------|------|
| H727/Control siRNA  | > 10uM           | 3.01 uM         | WT   |
| H727/Cripto-1 siRNA | > 10 uM          | 2.98 uM         |      |
| H322/Mock           | 5.15 uM          | 5.51 uM         | WT   |
| H322/Cripto-1       | 5.03 uM          | 5.62 uM         |      |



**Supplementary Table 2.** Combination treatment index related to Figure 5D (A) and Supplementary Figure 7C (B).

**A**

| No. | Erlotinib (nM) | AZD0530 (nM) | Fa     | CI    |
|-----|----------------|--------------|--------|-------|
| 1   | 100            | 10           | 0.2723 | 0.549 |
| 2   | 100            | 50           | 0.3504 | 0.375 |
| 3   | 100            | 100          | 0.3506 | 0.601 |
| 4   | 100            | 500          | 0.5520 | 0.835 |
| 5   | 100            | 1000         | 0.6795 | 0.849 |

**B**

| No. | Erlotinib (nM) | AZD0530 (nM) | Fa      | CI    |
|-----|----------------|--------------|---------|-------|
| 1   | 150            | 15.625       | 0.5087  | 1.233 |
| 2   | 150            | 31.25        | 0.52165 | 1.237 |
| 3   | 150            | 62.5         | 0.59585 | 1.031 |
| 4   | 150            | 125          | 0.7684  | 0.589 |
| 5   | 150            | 250          | 0.8551  | 0.478 |
| 6   | 150            | 500          | 0.9129  | 0.45  |
| 7   | 150            | 1000         | 0.9202  | 0.712 |

**Supplementary Table 3. Cripto-1 immunohistochemistry scores and patient characteristics.**

| No. | Status | OS (months) | Stage      | Sex | Smoking history | ECOG Performance status at initiation of EGFR-TKI | Histology | Previous chemotherapies | EGFR-TKI  | Response to EGFR-TKI | PFS (months) | Mutation           | IHC Score of Cripto-1 |
|-----|--------|-------------|------------|-----|-----------------|---------------------------------------------------|-----------|-------------------------|-----------|----------------------|--------------|--------------------|-----------------------|
| 1   | Dead   | 10.3        | IV         | M   | Never           | 1                                                 | Ad        | 1                       | Gefitinib | PD                   | 1.9          | Exon 19 del        | 3                     |
| 2   | Dead   | 10.8        | IIIb       | M   | Never           | 1                                                 | Ad        | 2                       | Erlotinib | PD                   | 0.9          | Exon 19 del        | 2                     |
| 3   | Dead   | 2.3         | IV         | M   | Current         | 2                                                 | Ad        | 3                       | Erlotinib | PD                   | 1.1          | Exon 19 del        | 3                     |
| 4   | Dead   | 11.9        | IV         | M   | Former          | 0                                                 | Ad        | 1                       | Gefitinib | SD                   | 6.9          | L858R              | 2                     |
| 5   | Dead   | 12.2        | Recurrence | M   | Current         | 1                                                 | Ad        | 2                       | Erlotinib | SD                   | 4            | Exon 19 del        | 1                     |
| 6   | Dead   | 16          | IV         | F   | Never           | 0                                                 | Ad        | 1                       | Gefitinib | SD                   | 4            | L858R              | 1                     |
| 7   | Dead   | 13          | IV         | M   | Never           | 1                                                 | Ad        | 1                       | Gefitinib | PD                   | 1            | L858R              | 1                     |
| 8   | Alive  | 11.3+       | Recurrence | M   | Former          | 1                                                 | Ad        | 3                       | Erlotinib | SD                   | 10.5         | L858R              | 0                     |
| 9   | Alive  | 13.1+       | IV         | M   | Never           | 1                                                 | Ad        | 0                       | Erlotinib | SD                   | 7.4          | L858R              | 1                     |
| 10  | Dead   | 64.4        | IIIb       | F   | Never           | 1                                                 | Ad        | 1                       | Gefitinib | PR                   | 16.1         | Exon 19 del        | 1                     |
| 11  | Dead   | 23.2        | IV         | F   | Never           | 1                                                 | Ad        | 1                       | Gefitinib | PR                   | 10.9         | L858R              | 1                     |
| 12  | Dead   | 17.7        | IV         | F   | Never           | 0                                                 | Ad        | 1                       | Gefitinib | PR                   | 16.1         | L858R              | 1                     |
| 13  | Alive  | 20.5+       | IV         | M   | Former          | 1                                                 | Ad        | 4                       | Erlotinib | PR                   | 14           | Exon 19 del        | 1                     |
| 14  | Dead   | 12.6        | IV         | M   | Current         | 1                                                 | Ad        | 3                       | Gefitinib | PR                   | 7.6          | Exon 19 del        | 2                     |
| 15  | Dead   | 11.1        | IV         | F   | Never           | 1                                                 | Sq        | 0                       | Gefitinib | PR                   | 10.9         | L858R              | 1                     |
| 16  | Dead   | 9           | IV         | F   | Never           | 1                                                 | Ad        | 1                       | Gefitinib | PR                   | 5.8          | Exon 19 del        | 1                     |
| 17  | Alive  | 45.6+       | Recurrence | F   | Never           | 0                                                 | Ad        | 0                       | Gefitinib | PR                   | 24.6         | Exon 19 del        | 0                     |
| 18  | Dead   | 20          | IV         | F   | Never           | 1                                                 | Ad        | 0                       | Gefitinib | PR                   | 10.3         | Exon 19 del        | 0                     |
| 19  | Alive  | 51.3+       | IV         | F   | Never           | 1                                                 | Ad        | 0                       | Gefitinib | PR                   | 51.3+        | Exon 19 del        | 2                     |
| 20  | Alive  | 19.2+       | IV         | F   | Never           | 1                                                 | Ad        | 1                       | Gefitinib | PR                   | 7.2          | Exon 19 del        | 1                     |
| 21  | Dead   | 25.6        | IV         | F   | Never           | 2                                                 | Ad        | 0                       | Gefitinib | PR                   | 20.4         | L858R              | 0                     |
| 22  | Alive  | 36.9+       | Recurrence | F   | Never           | 1                                                 | Ad        | 0                       | Gefitinib | PR                   | 25.8         | Exon 19 del        | 0                     |
| 23  | Dead   | 27.8        | IV         | F   | Never           | 2                                                 | Ad        | 3                       | Erlotinib | PR                   | 11.1         | L858R /T790M       | 0                     |
| 24  | Alive  | 18.0+       | IV         | F   | Never           | 0                                                 | Ad        | 1                       | Erlotinib | PR                   | 10.1         | Exon 19 del /T790M | 0                     |
| 25  | Alive  | 9.8+        | IV         | F   | Former          | 0                                                 | Ad        | 1                       | Erlotinib | PR                   | 9.8          | Exon 19 del        | 0                     |
| 26  | Alive  | 11.3+       | IV         | F   | Never           | 1                                                 | Ad        | 1                       | Erlotinib | PR                   | 10.2         | L858R              | 1                     |
| 27  | Alive  | 72.6+       | IV         | F   | Former          | 0                                                 | Ad        | 2                       | Erlotinib | PR                   | 50.9         | L858R              | 0                     |
| 28  | Alive  | 29.5+       | IV         | F   | Former          | 1                                                 | Ad        | 2                       | Erlotinib | PR                   | 13.2         | Exon 19 del /T790M | 2                     |
| 29  | Alive  | 16.1+       | Recurrence | F   | Never           | 1                                                 | Ad        | 1                       | Erlotinib | PR                   | 16.1         | Exon 19 del        | 0                     |
| 30  | Alive  | 30.5+       | IV         | M   | Former          | 0                                                 | Ad        | 0                       | Erlotinib | PR                   | 30.5+        | Exon 19 del        | 0                     |
| 31  | Alive  | 23+         | IV         | M   | Former          | 1                                                 | Ad        | 1                       | Erlotinib | PR                   | 23+          | Exon 19 del /T790M | 0                     |
| 32  | Dead   | 2           | IV         | M   | Never           | 1                                                 | BAC       | 0                       | Erlotinib | PD                   | 1            | L858R              | 3                     |
| 33  | Alive  | 17+         | IV         | M   | Never           | 2                                                 | Ad        | 0                       | Erlotinib | PR                   | 9            | Exon 19 del        | 0                     |
| 34  | Dead   | 9           | IV         | M   | Never           | 1                                                 | other     | 0                       | Erlotinib | PD                   | 1            | Exon 19 del        | 3                     |
| 35  | Alive  | 13+         | IV         | F   | Never           | 1                                                 | Ad        | 0                       | Erlotinib | CR                   | 13+          | Exon 19 del        | 0                     |
| 36  | Alive  | 17+         | IV         | F   | Never           | 0                                                 | BAC       | 1                       | Erlotinib | SD                   | 17+          | Exon 19 del        | 2                     |
| 37  | Alive  | 11+         | IV         | F   | Never           | 2                                                 | Ad        | 1                       | Erlotinib | PR                   | 11+          | Exon 19 del        | 0                     |
| 38  | Alive  | 8+          | IV         | F   | Never           | 1                                                 | Ad        | 0                       | Erlotinib | CR                   | 8+           | Exon 19 del        | 0                     |
| 39  | Alive  | 15+         | IV         | F   | Never           | 0                                                 | Ad        | 0                       | Erlotinib | PR                   | 15+          | L858R /T790M       | 0                     |
| 40  | Alive  | 12+         | IV         | F   | Never           | 1                                                 | Ad        | 1                       | Erlotinib | PR                   | 12+          | Exon 19 del /T790M | 0                     |

(Table 2 Cont.)

| No. | Status | OS (months) | Stage | Sex | Smoking history | ECOG Performance status at initiation of EGFR-TKI | Histology | Previous chemotherapies | EGFR-TKI              | Response to EGFR-TKI | PFS (months) | Mutation          | IHC Score of Cripto-1 |
|-----|--------|-------------|-------|-----|-----------------|---------------------------------------------------|-----------|-------------------------|-----------------------|----------------------|--------------|-------------------|-----------------------|
| 41  | Alive  | 13+         | IV    | M   | Former          | 1                                                 | BAC       | 0                       | Erlotinib             | PR                   | 13+          | Exon 19           | 0                     |
| 42  | Alive  | 7+          | IV    | M   | Current         | 2                                                 | Ad        | 0                       | Erlotinib             | PR                   | 7+           | L858R/T790M       | 0                     |
| 43  | Alive  | 10+         | IV    | F   | Never           | 1                                                 | Ad        | 0                       | Erlotinib             | PR                   | 10+          | Exon 19           | 0                     |
| 44  | Dead   | 9           | IV    | F   | Former          | 0                                                 | Ad        | 1                       | Erlotinib             | PR                   | 9            | Exon 19 del/T790M | 0                     |
| 45  | Alive  | 4+          | IV    | M   | Never           | 1                                                 | Ad        | 1                       | Erlotinib             | PR                   | 4+           | L858R/T790M       | 0                     |
| 46  | Alive  | 8+          | IV    | F   | Never           | 0                                                 | Ad        | 0                       | Erlotinib             | PR                   | 8+           | Exon 19 del       | 0                     |
| 47  | Dead   | 5           | IV    | F   | Never           | 2                                                 | Ad        | 0                       | Erlotinib             | PR                   | 5            | Exon 19 del       | 0                     |
| 48  | Alive  | 7+          | IV    | F   | Never           | 1                                                 | Ad        | 0                       | Erlotinib             | PR                   | 7+           | L858R             | 0                     |
| 49  | Alive  | 7+          | IV    | F   | Current         | 1                                                 | Ad        | 0                       | Erlotinib             | PR                   | 7+           | Exon 19 del       | 0                     |
| 50  | Alive  | 11+         | IV    | M   | Never           | 2                                                 | Ad        | 1                       | Erlotinib             | PR                   | 8            | L858R             | 0                     |
| 51  | Alive  | 47+         | IV    | M   | Current         | 1                                                 | Ad        | 1                       | Gefitinib             | PD                   | 1.1          | Exon 19 del       | 2                     |
| 52  | Dead   | 44.3        | IV    | F   | Never           | 1                                                 | Ad        | 1                       | Gefitinib             | SD                   | 9.6          | L858R             | 1                     |
| 53  | Dead   | 19.2        | IV    | M   | Never           | 1                                                 | Ad        | 1                       | Gefitinib             | SD                   | 3.5          | L858R             | 2                     |
| 54  | Alive  | 34.3+       | IV    | F   | Never           | 1                                                 | Ad        | 1                       | Gefitinib             | SD                   | 27.7         | L858R             | 2                     |
| 55  | Alive  | 7+          | IV    | F   | Never           | 1                                                 | Ad        | 1                       | Gefitinib + Erlotinib | PD                   | 3.8          | L858R             | 3                     |
| 56  | Alive  | 43+         | IV    | M   | Never           | 1                                                 | Ad        | 1                       | Gefitinib             | PR                   | 18.4         | G719C             | 0                     |
| 57  | Dead   | 30          | IV    | M   | Former          | 1                                                 | Ad        | 0                       | Gefitinib             | CR                   | 11.8         | Exon 19 del       | 0                     |
| 58  | Dead   | 16.5        | IV    | M   | Never           | 1                                                 | Ad        | 0                       | Gefitinib             | PR                   | 3.9          | Exon 19 del       | 0                     |
| 59  | Dead   | 21.1        | IV    | M   | Current         | 1                                                 | Ad        | 0                       | Gefitinib             | PR                   | 1.6          | G719              | 0                     |
| 60  | Dead   | 6           | IV    | F   | Never           | 1                                                 | other     | 0                       | Gefitinib             | PR                   | 2            | Exon 19 del       | 2                     |
| 61  | Dead   | 40.3        | IV    | F   | Current         | 1                                                 | Ad        | 0                       | Gefitinib             | PR                   | 38.2         | L858R             | 0                     |
| 62  | Alive  | 7.8+        | IV    | M   | Current         | 1                                                 | Ad        | 0                       | Gefitinib             | SD                   | 2.5          | Exon 19 del       | 1                     |
| 63  | Alive  | 4+          | IV    | M   | Current         | 1                                                 | Ad        | 1                       | Gefitinib             | SD                   | 4.2          | Exon 19 del       | 1                     |
| 64  | Alive  | 13+         | IV    | F   | Current         | 1                                                 | Ad        | 1                       | Gefitinib             | PR                   | 11.1         | Exon 19 del       | 0                     |
| 65  | Alive  | 124+        | IV    | F   | Never           | 0                                                 | Ad        | 0                       | Gefitinib             | SD                   | 64.6         | Exon 19 del       | 2                     |
| 66  | Dead   | 89.2        | IIIA  | M   | Smoker          | 1                                                 | Ad        | 0                       | Gefitinib             | SD                   | 14.9         | Exon 19 del       | 3                     |
| 67  | Dead   | 71.5        | IIIA  | M   | Smoker          | 0                                                 | Ad        | 0                       | Gefitinib             | SD                   | 14.8         | Exon 19 del       | 2                     |
| 68  | Dead   | 65.9        | IIIA  | M   | Never           | 3                                                 | Ad        | 2                       | Gefitinib             | PD                   | 2.7          | L858R             | 2                     |
| 69  | Dead   | 62          | IV    | F   | Never           | 1                                                 | Ad        | 1                       | Gefitinib             | PR                   | 32.8         | Exon 19 del       | 0                     |
| 70  | Dead   | 44.8        | IIA   | F   | Never           | 1                                                 | Ad        | 2                       | Gefitinib             | PR                   | 5            | Exon 19 del       | 0                     |
| 71  | Dead   | 82.8        | IA    | F   | Never           | 1                                                 | Ad        | 0                       | Gefitinib             | PR                   | 18.8         | Exon 19 del       | 0                     |
| 72  | Dead   | 80.2        | IB    | F   | Smoker          | 1                                                 | Ad        | 2                       | Gefitinib             | PR                   | 4.8          | Exon 19 del       | 0                     |
| 73  | Dead   | 84.4        | IIIA  | F   | Never           | 1                                                 | Ad        | 0                       | Gefitinib             | PR                   | 8.8          | Exon 19 del       | 0                     |
| 74  | Dead   | 38          | IIIA  | F   | Never           | 0                                                 | Ad        | 0                       | Gefitinib             | CR                   | 9.9          | L858R             | 0                     |
| 75  | Dead   | 69.2        | IIB   | F   | Never           | 0                                                 | Ad        | 0                       | Gefitinib             | PR                   | 5.9          | L858R             | 0                     |
| 76  | Dead   | 18.8        | IIIB  | M   | Smoker          | 2                                                 | AdSq      | 1                       | Gefitinib             | PR                   | 8.6          | Exon 19 del       | 0                     |
| 77  | Dead   | 57.7        | IIB   | M   | Never           | 0                                                 | Ad        | 0                       | Gefitinib             | PR                   | 25.5         | G719C             | 0                     |
| 78  | Dead   | 53.7        | IIIA  | M   | Smoker          | 1                                                 | Ad        | 0                       | Gefitinib             | CR                   | 12.1         | Exon 19 del       | 0                     |
| 79  | Dead   | 64.3        | IIIA  | M   | Never           | 0                                                 | Ad        | 0                       | Gefitinib             | PR                   | 3.8          | Exon 19 del       | 0                     |
| 80  | Dead   | 20.8        | IIIB  | M   | Smoker          | 0                                                 | Ad        | 0                       | Gefitinib             | PR                   | 1.6          | G719              | 0                     |
| 81  | Dead   | 6.2         | IIIB  | F   | Never           | 2                                                 | Ad        | 0                       | Gefitinib             | PR                   | 1.9          | Exon 19 del       | 0                     |
| 82  | Dead   | 14.3        | IIIA  | F   | Smoker          | 1                                                 | Ad        | 2                       | Gefitinib             | PR                   | 10.9         | Exon 19 del       | 0                     |
| 83  | Alive  | 42+         | IV    | M   | Former          | 1                                                 | Ad        | 1                       | Erlotinib             | PR                   | 18           | Exon 19 del       | 0                     |
| 84  | Dead   | 9           | IV    | F   | Former          | 2                                                 | Ad        | 0                       | Erlotinib             | PD                   | 6            | G719S             | 3                     |
| 85  | Alive  | 4+          | IIIB  | F   | Never           | 0                                                 | Ad        | 0                       | Gefitinib             | PD                   | 2            | Exon 19 del       | 2                     |

OS = Overall survival

Stage: Recurrence = recurrence after surgical resection with or without adjuvant chemotherapy

Sex: M = male; F = female

Histology: Ad = adenocarcinoma; Sq = Squamous carcinoma; BAC = bronchoalveolar carcinoma

Response: PD = progressive disease; SD = stable disease; PR = partial response; CR = complete response

PFS = Progression-free survival

**Supplementary Table 4.** Combination treatment index related to HCC827ER (A) H4006ER (B) cells in Supplementary Figure 9B and 9C. Fa, fraction affected; CI, combination index.

A

| No. | Erlotinib (uM) | AZD0530 (uM) | Fa      | CI    |
|-----|----------------|--------------|---------|-------|
| 1   | 40             | 0.15625      | 0.391   | 1.116 |
| 2   | 40             | 0.3125       | 0.39405 | 1.152 |
| 3   | 40             | 0.625        | 0.3895  | 1.278 |
| 4   | 40             | 1.25         | 0.46825 | 1.047 |
| 5   | 40             | 2.5          | 0.51005 | 1.1   |
| 6   | 40             | 5            | 0.58205 | 1.113 |
| 7   | 40             | 10           | 0.6587  | 1.191 |

B

| No. | Erlotinib (uM) | AZD0530 (uM) | Fa      | CI    |
|-----|----------------|--------------|---------|-------|
| 1   | 20             | 0.15625      | 0.50335 | 1.12  |
| 2   | 20             | 0.3125       | 0.5133  | 1.11  |
| 3   | 20             | 0.625        | 0.5293  | 1.099 |
| 4   | 20             | 1.25         | 0.58107 | 0.982 |
| 5   | 20             | 2.5          | 0.6108  | 0.999 |
| 6   | 20             | 5            | 0.66085 | 0.989 |
| 7   | 20             | 10           | 0.7034  | 1.079 |
